# Supplementary material for: Calix[4]arenes featuring a direct lower rim attachment of dansyl groups. Synthesis, fluorescence properties and first report on crystal structures
Source: Royal Society of Chemistry journal article supplement (doi:10.1039/b911800d), 2009-01-01
Supplement: b911800d.pdf [file b911800d.pdf]

**Supplement:**

**S1:** CIF-data file of compound **2**.

**S2:** CIF-data file of compound **3**.

**S3:** CIF-data file of compound **5b**.

**Fig. S1** Fluorescence emission spectra of the reference compound **8** ( $35 \mu\text{mol L}^{-1}$ ) in acetonitrile in the presence of different metal salts ( $70 \mu\text{mol L}^{-1}$ ).

**Fig. S2** Quenching ratio  $[(I_0 - I)/I_0]$  of the fluorescence intensity of **8** upon addition of 2 equiv.  $\text{Cu}^{2+}$  in the presence of 4 equiv. background metal ions in acetonitrile.

**Fig. S3**  $^1\text{H-NMR}$  spectrum of compound **5a** in  $\text{CDCl}_3$  at 295 K.

**Fig. S4**  $^1\text{H-NMR}$  spectrum of compound **5b** in  $\text{CDCl}_3$  at 295 K.

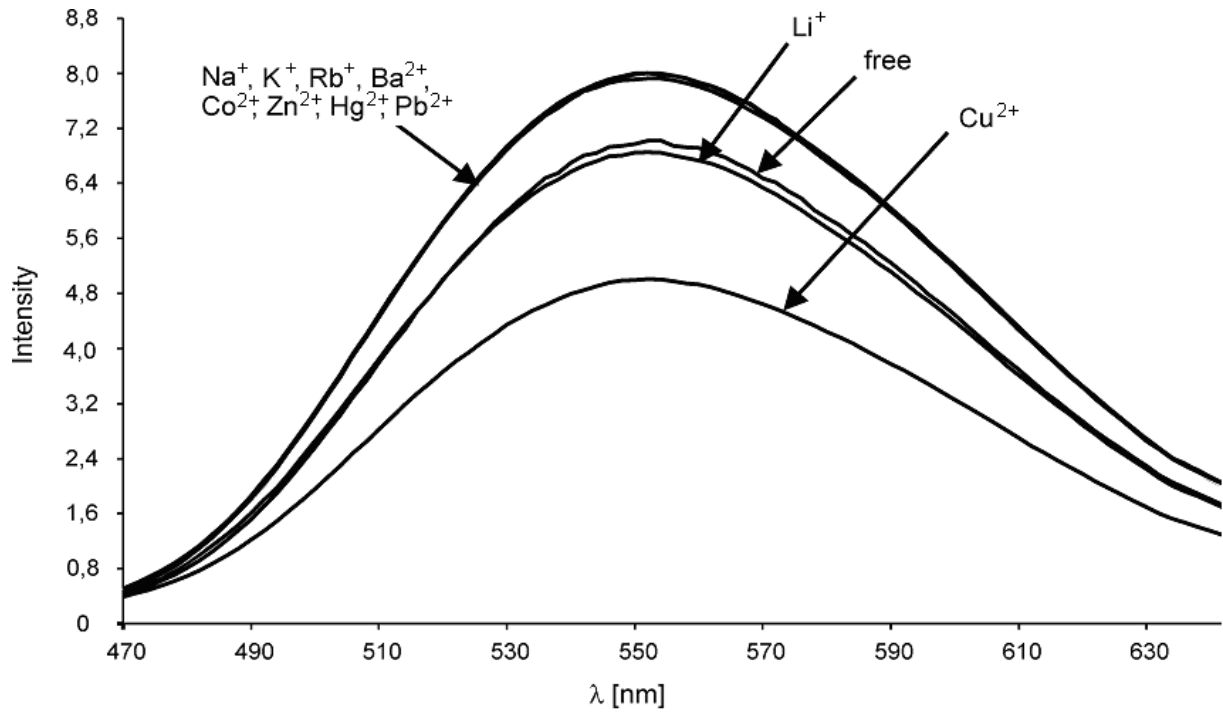

Figure S1

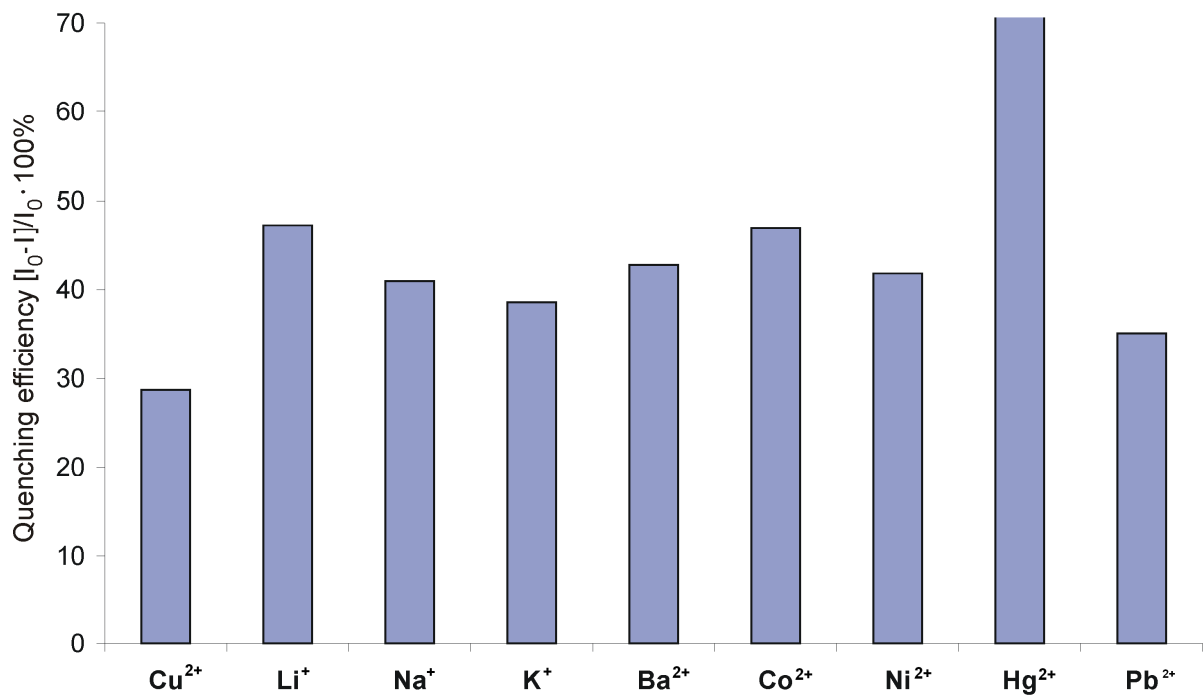

Figure S2

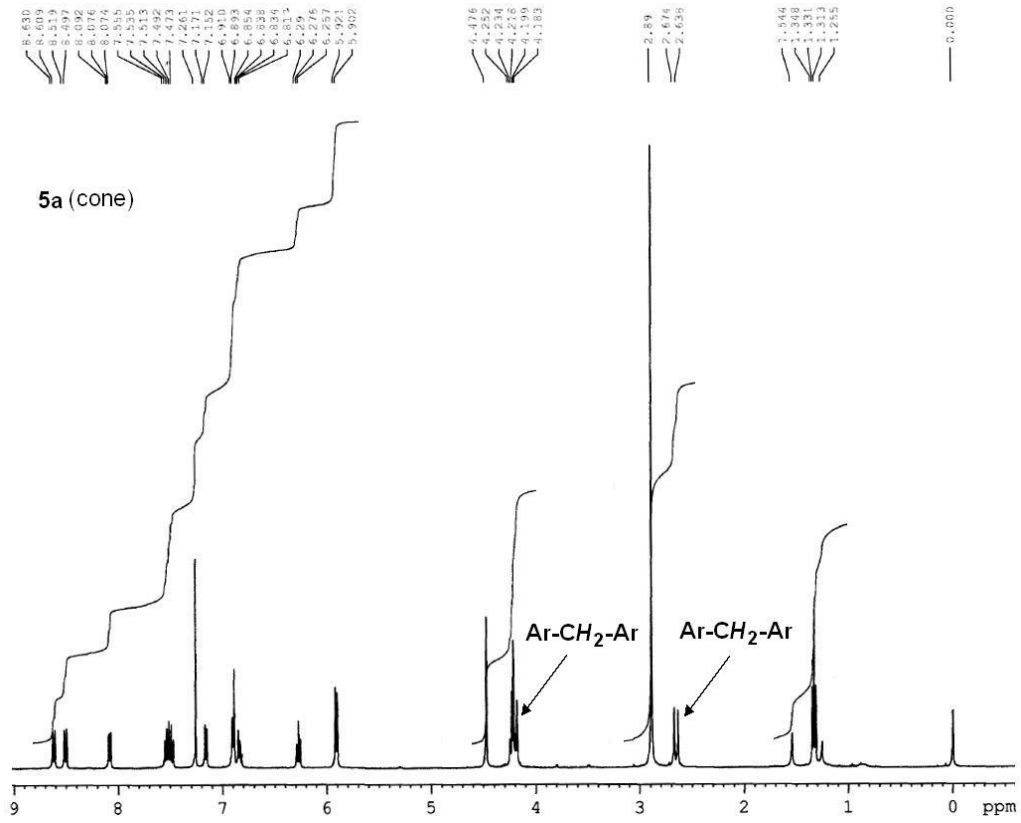

Figure S3

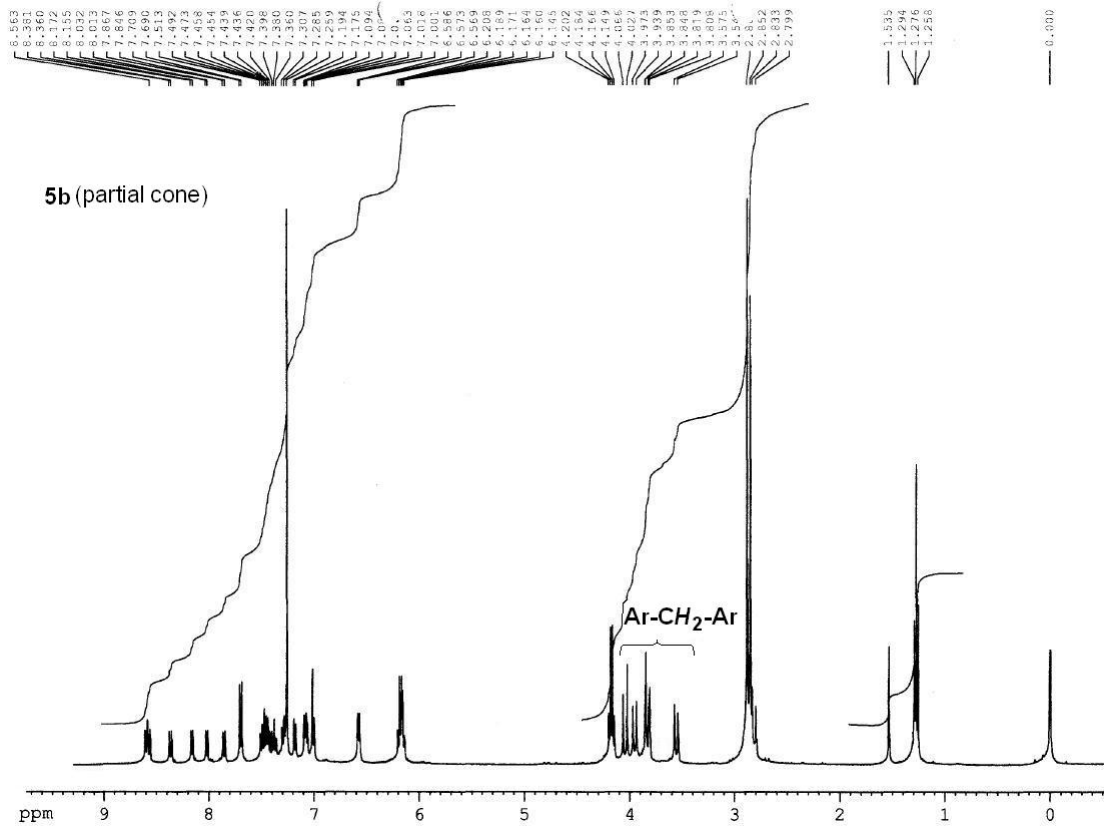

Figure S4
